# Supplementary material for: Strategies for improving the water solubility of new antitumour nitronaphthylbutadiene derivatives
Source: Royal Society of Chemistry journal article supplement (doi:10.1039/c0ob00493f), 2010-01-01
Supplement: c0ob00493f.pdf [file c0ob00493f.pdf]

## Strategies for improving the water solubility of new antitumour

### nitronaphthylbutadiene derivatives

Antonella Fontana,<sup>\*a</sup> Maurizio Viale,<sup>b</sup> Susanna Guernelli,<sup>c</sup> Carla Gasbarri,<sup>a</sup> Egon Rizzato,<sup>c</sup>  
Massimo Maccagno,<sup>d</sup> Giovanni Petrillo,<sup>d</sup> Cinzia Aiello,<sup>b</sup> Silvano Ferrini,<sup>b</sup> Domenico Spinelli<sup>\*e</sup>

<sup>a</sup> *Dipartimento di Scienze del Farmaco, Università 'G. d'Annunzio', Via dei Vestini 31, Chieti 66013, Italia.* <sup>b</sup> *Istituto Nazionale per la Ricerca sul Cancro, S. C. Terapia Immunologica, L.go R. Benzi 10, 16132 Genova, Italia* <sup>c</sup> *Dipartimento di Chimica Organica 'A. Mangini', Università di Bologna, Via San Giacomo 11, Bologna 40126, Italia.* <sup>d</sup> *Dipartimento di Chimica e Chimica Industriale, Università di Genova, Via Dodecaneso 31, Genova 16146, Italia.* <sup>e</sup> *Dipartimento di Chimica 'G. Ciamician', Università di Bologna, Via Selmi 2, Bologna 40126, Italia*

### Supplementary Material

Content:

**Figure S1.** Positive ion ESI-MS mass spectra of the complexes of **1-Naph-DNB** with  $\beta$ -CD and of **1-Naph-DNB** with DM $\beta$ CD at  $t_0$  (i.e. just after mixing).

**Figure S2.** Positive ion ESI-MS mass spectra (2000-3000 m/z interval) of the complexes of **1-Naph-DNB** with  $\beta$ -CD or with DM $\beta$ CD at  $t_{20}$  (i.e. after 20 minutes of mixing).

**Figure S3:** Titration of **1-Naph-DNB** 35  $\mu$ M with  $\beta$ -CD at  $\lambda_{\max}$  223 nm according to a 1:2 complexation model.

**Figure S4:** Titration of **1-Naph-DNB** 35  $\mu$ M with DM $\beta$ CD at  $\lambda_{\max}$  223 nm according to a 1:2 complexation model.

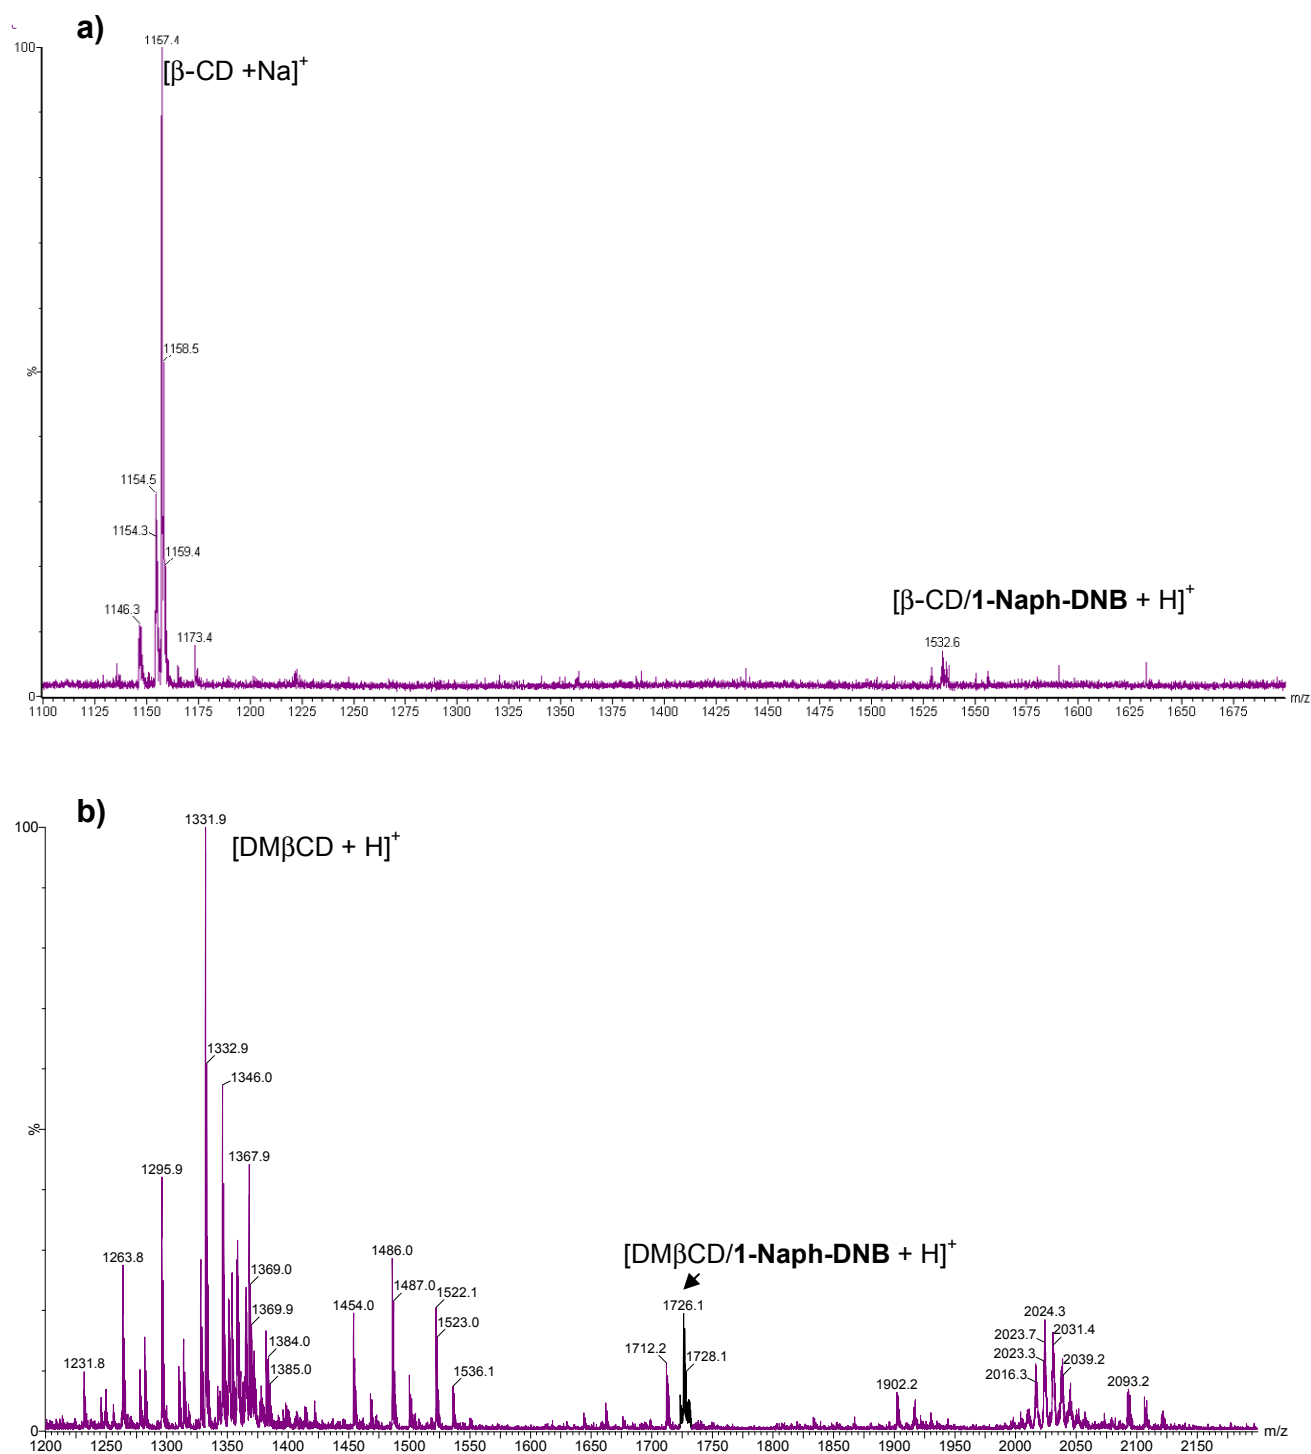

**Figure S1.** Positive ion ESI-MS mass spectra of the complexes of 1-Naph-DNB with  $\beta$ -CD and of 1-Naph-DNB with DM $\beta$ CD at  $t_0$  (i.e. just after mixing).

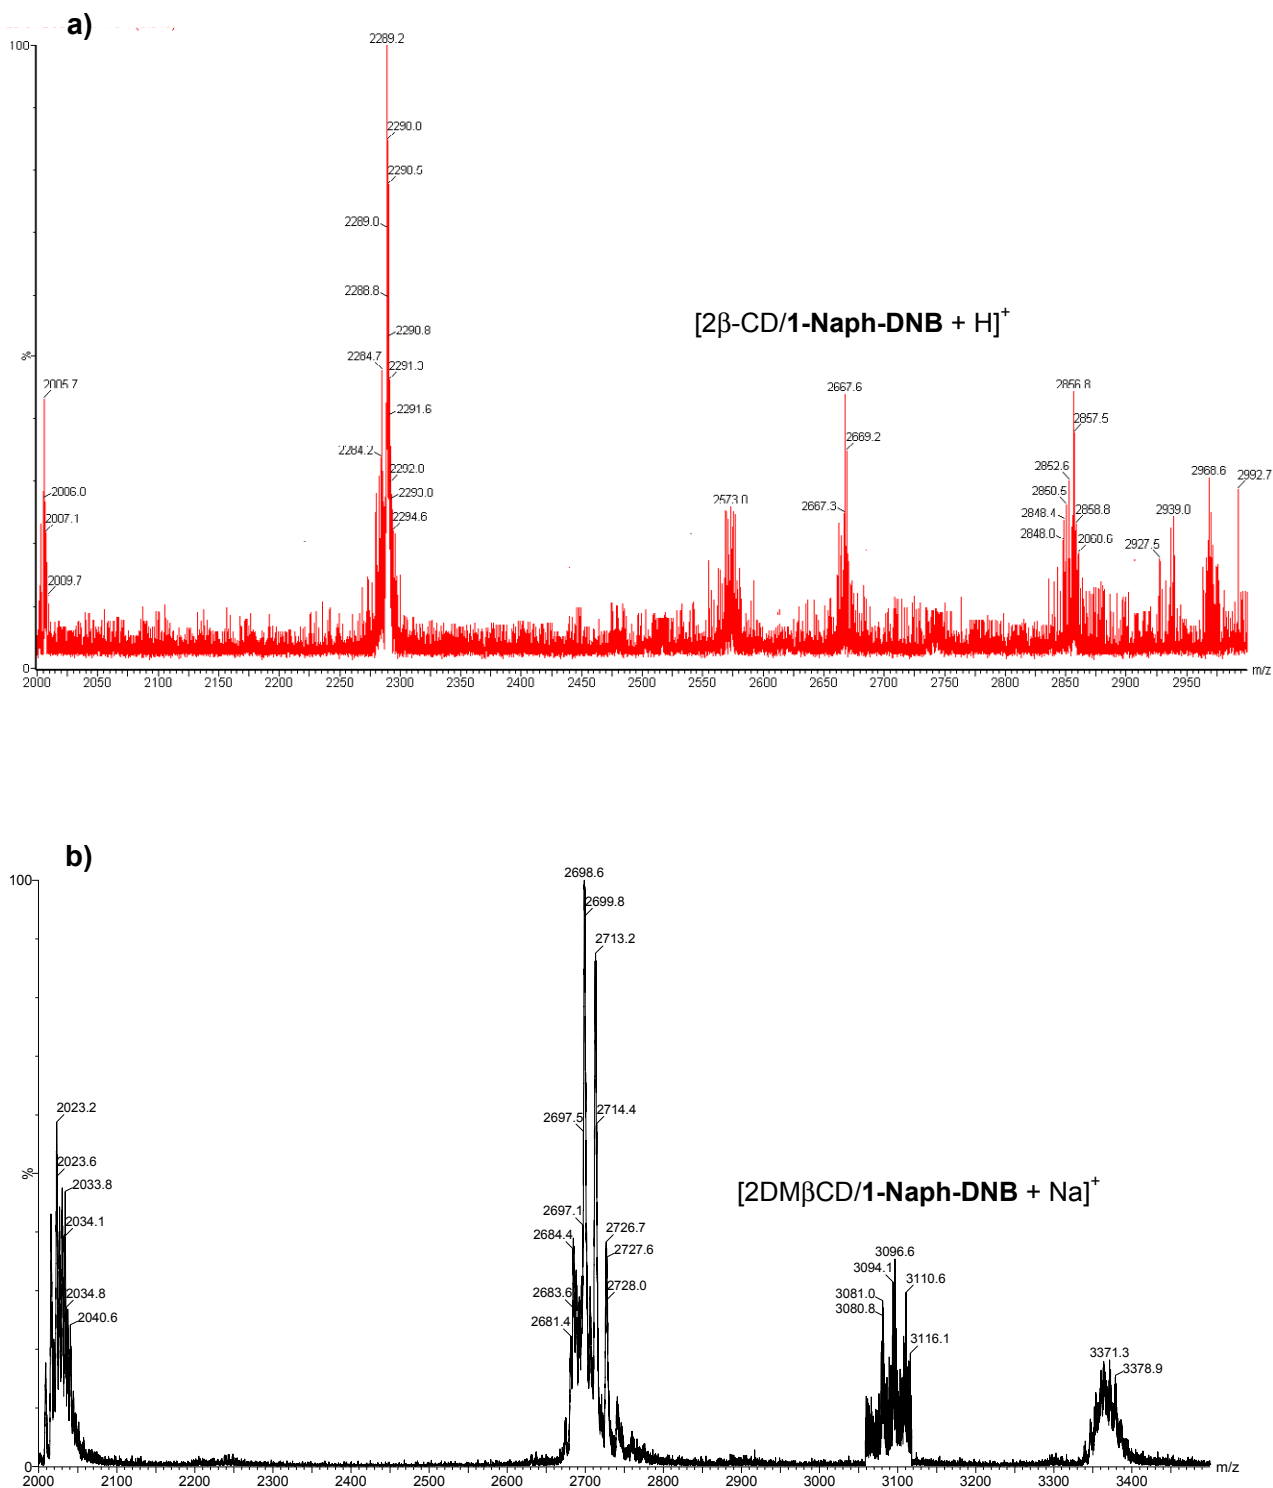

**Figure S2.** Positive ion ESI-MS mass spectra (2000-3000 m/z interval) of the complexes of 1-Naph-DNB with  $\beta$ -CD or with DM $\beta$ CD at  $t_{20}$  (i.e. after 20 minutes of mixing).

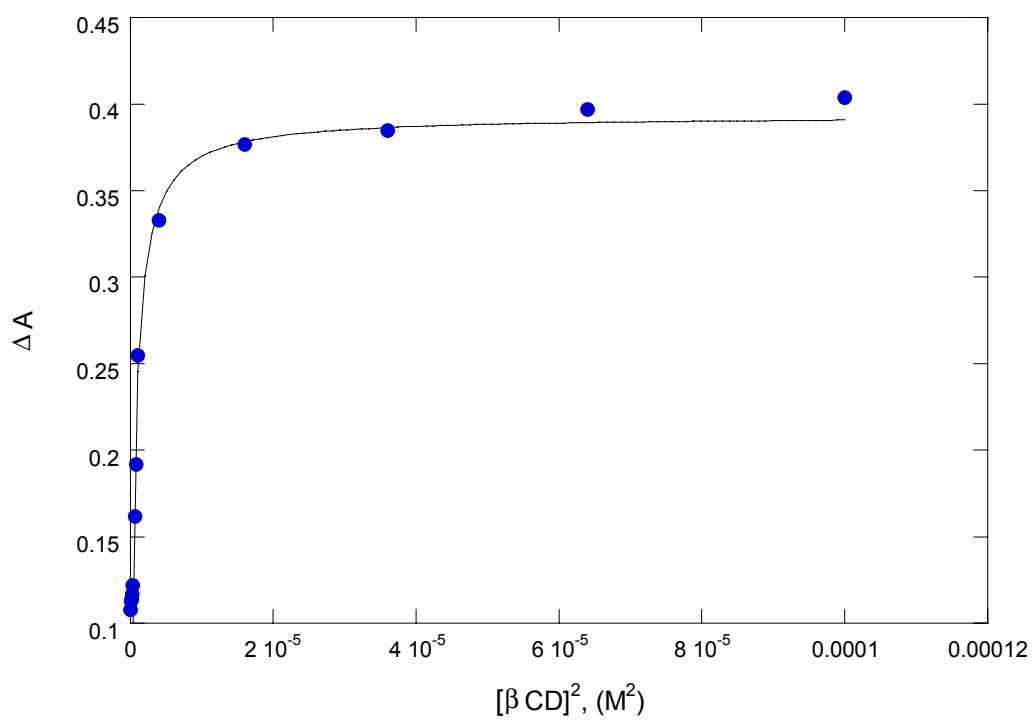

**Figure S3:** Titration of **1-Naph-DNB** 35  $\mu\text{M}$  with  $\beta\text{-CD}$  at  $\lambda_{\text{max}}$  223 nm according to a 1:2 complexation model.

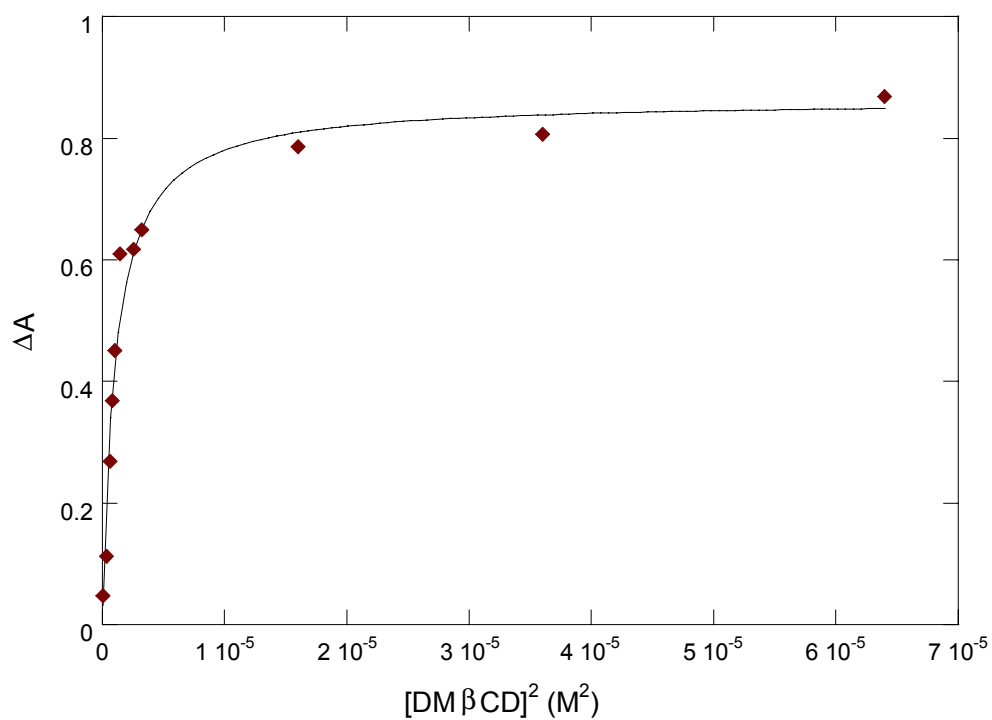

**Figure S4:** Titration of **1-Naph-DNB** 35  $\mu\text{M}$  with  $\text{DM}\beta\text{CD}$  at  $\lambda_{\text{max}}$  223 nm according to a 1:2 complexation model.
